1 A conserved acidic cluster motif in SERINC5 confers  
2 resistance to antagonism by HIV-1 Nef

3  
4 Charlotte A. Stoneham<sup>a,b</sup>, Peter W. Ramirez<sup>a</sup>, Rajendra Singh<sup>a,b</sup>, Marissa Suarez<sup>b</sup>,  
5 Andrew Debray<sup>a</sup>, Christopher Lim<sup>c</sup>, Xiaofei Jia<sup>d</sup>, Yong Xiong<sup>c</sup>, and John Guatelli<sup>a,b,#</sup>

6  
7 <sup>a</sup>Department of Medicine, University of California San Diego, La Jolla, California, USA.

8 <sup>b</sup>The VA San Diego Healthcare System, San Diego, California, USA.

9 <sup>c</sup>Department of Molecular Biophysics and Biochemistry, Yale University, New Haven,  
10 Connecticut, USA.

11  
12 <sup>d</sup>Department of Chemistry and Biochemistry, University of Massachusetts Dartmouth,  
13 Dartmouth, Massachusetts, USA.

14  
15 Running Head: A Nef-resistance sequence in SERINC5

16  
17 #Address Correspondence to John Guatelli, [jguatelli@ucsd.edu](mailto:jguatelli@ucsd.edu)

18  
19 C.S. and P.W.R contributed equally to this work.

20  
21  
22  
23  
24  
25  
26

27 **Abstract**

28

29 The cellular protein SERINC5 inhibits the infectivity of diverse retroviruses and is  
30 counteracted by the glycoGag protein of MLV, the S2 protein of EIAV, and the Nef  
31 protein of HIV-1. Determining regions within SERINC5 that provide restrictive activity or  
32 Nef-sensitivity should inform mechanistic models of the SERINC5/HIV-1 relationship.  
33 Here, we report that deletion of the highly conserved sequence EDTEE, which is  
34 located within a cytoplasmic loop of SERINC5 and is reminiscent of an acidic cluster  
35 membrane trafficking signal, increases the sensitivity of SERINC5 to antagonism by Nef  
36 while having no effect on the intrinsic activity of the protein as an inhibitor of infectivity.  
37 The effects on infectivity correlated with enhanced removal of the  $\Delta$ EDTEE mutant  
38 relative to wild type SERINC5 from the cell surface and with enhanced exclusion of the  
39 mutant protein from virions by Nef. Mutational analysis revealed that the acidic residues,  
40 but not the threonine, within the EDTEE motif are important for the relative resistance to  
41 Nef. Deletion of the EDTEE sequence did not increase the sensitivity of SERINC5 to  
42 antagonism by the glycoGag protein of MLV, suggesting that its virologic role is Nef-  
43 specific. These results are consistent with the reported mapping of the cytoplasmic loop  
44 that contains the EDTEE sequence as a general determinant of Nef-responsiveness,  
45 but they further indicate that sequences inhibitory to as well as supportive of Nef-activity  
46 reside in this region. We speculate that the EDTEE motif might have evolved to mediate  
47 resistance against retroviruses that use Nef-like proteins to antagonize SERINC5.

48

49

## 50 **Importance**

51 Cellular membrane proteins in the SERINC family, especially SERINC5, inhibit the  
52 infectivity of retroviral virions. This inhibition is counteracted by retroviral proteins,  
53 specifically HIV-1 Nef, MLV glycoGag, and EIAV S2. One consequence of such a host-  
54 pathogen “arms race” is compensatory change in the host antiviral protein as it evolves  
55 to escape the effects of the viral antagonist. This is often reflected in a genetic  
56 signature, positive selection, which is conspicuously missing in *SERINC5*. Here we  
57 show that despite this lack of genetic evidence, a sequence in SERINC5 nonetheless  
58 provides relative resistance to antagonism by HIV-1 Nef.

59

## 60 **Introduction**

61 HIV-1 is a complex retrovirus, encoding “accessory” genes that evolved to  
62 enhance viral fitness in response to host-selective pressures (1). The accessory gene  
63 *nef* accelerates *in vivo* pathogenesis and progression to AIDS, despite being non-  
64 essential for viral propagation in cell-culture (2–4). Expression of the Nef protein occurs  
65 early during the viral replication cycle, preceding the expression of structural proteins  
66 such as the envelope glycoprotein (Env) and preceding virion assembly (5). Post-  
67 translational myristoylation on an N-terminal glycine residue enables Nef to associate  
68 with lipid membranes (6), where it modulates the trafficking of host proteins to promote  
69 immune evasion. Nef-activities include down-regulation of the HIV receptor CD4 (6) and  
70 the major histocompatibility complex I (MHC-I) from the cell surface (7). To modulate  
71 CD4, Nef uses a di-leucine-based motif to recruit components of the cellular protein  
72 sorting machinery, specifically the clathrin-Adaptor-Protein complex 2 (AP-2), to induce

73 the endocytosis of CD4 and ultimately target it to the multivesicular body (MVB)  
74 pathway for lysosomal degradation (8–11). CD4 modulation is also an activity of the HIV  
75 accessory protein Vpu; together the activities of Vpu and Nef prevent CD4 and Env from  
76 interacting in the virion-producer cell. This ensures the proper maturation of Env,  
77 preventing CD4 from inhibiting virion-infectivity and from triggering the exposure of  
78 CD4-dependent epitopes in Env that are good targets for host humoral immunity (12–  
79 17). In contrast to the above consensus regarding CD4, two mechanisms have been  
80 proposed for Nef-mediated modulation of MHC-I: 1) Nef utilizes the clathrin adaptor AP-  
81 1 to bind newly synthesized and antigen-loaded MHC-I molecules within the *trans*-Golgi  
82 network (TGN) to target them for eventual lysosomal degradation (18); and 2) Nef  
83 accelerates the internalization of MHC-I from the cell-surface via a PI3-kinase-regulated  
84 and ARF6-mediated pathway to promote sequestration of MHC-I within the TGN (19).  
85 Either of these mechanisms could lead to a reduction of MHC-I molecules at the cell  
86 surface and resistance of HIV-1 infected cells to killing by cytotoxic T lymphocytes (20).

87 Another highly conserved activity of Nef is the enhancement of virion-infectivity  
88 (21, 22). This activity is preserved among *nef* alleles obtained from HIV-1-infected  
89 individuals at different stages of disease progression, suggesting that it is important  
90 both for transmission and for persistent infection (23). The infectivity-effect is dependent  
91 on specific regions within Nef, all of which are also required for the modulation of CD4,  
92 including the above noted di-leucine-based motif. Components of the cellular endocytic  
93 machinery (AP-2, Dynamin 2, and clathrin) are also required (24, 25). Nef must be  
94 expressed within virion-producer cells to enhance infectivity; its presence in target cells

95 and in virions is dispensable (26, 27). These observations led to the hypothesis that Nef  
96 prevents a cell surface “infectivity-inhibiting-factor” from incorporating into virions.

97 Serine incorporator 3 and 5 (SERINC3 and SERINC5) were identified as such  
98 factors; they are transmembrane proteins that incorporate into virions and potently  
99 inhibit the infectivity of retroviruses (28, 29). Nef counteracts this by removing SERINC3  
100 and SERINC5 from the plasma membrane in an AP-2 dependent manner (29). Nef’s  
101 ability to enhance infectivity depends quantitatively on the relative sensitivity or  
102 resistance of the tested Env protein to inhibition by the SERINC5s: the Nef-effect is  
103 greatest when the matching Env protein is sensitive to SERINC5 (28, 29). This  
104 sensitivity in turn appears to correlate directly with the “openness” of the Env trimer and  
105 consequently with the sensitivity of the Env to neutralizing antibodies that are selectively  
106 active against more “open” trimers (30).

107 SERINC3 and SERINC5 are members of a conserved family of proteins whose  
108 cellular function includes phospholipid biosynthesis, specifically the incorporation of  
109 serine into membrane lipids (31). Nonetheless, SERINC5 does not appear to alter the  
110 lipid composition of virions (32). Instead, SERINC5 inhibits the fusion of virions with  
111 target cells, potentially by functionally inactivating sensitive Env trimers (33). Nef  
112 prevents the incorporation of SERINC5 into virions, presumably by physically interacting  
113 with SERINC5, and then stimulating its endocytosis and sending the protein toward  
114 lysosomal degradation (34). SERINC5 antagonists have been identified in retroviruses  
115 other than HIV and SIV. These include the glycoGag protein of Murine Leukemia Virus  
116 (MLV) (35) and the S2 protein of Equine Infectious Anemia Virus (EIAV) (36). While Nef  
117 and glycoGag are structurally unrelated, the mechanisms by which they counteract

118 SERINC5 seem similar: endocytosis and lysosomal degradation (37). Despite this  
119 scenario of host-pathogen conflict between the SERINC5s and retroviral proteins,  
120 *SERINC3* and *SERINC5* do not appear to be under positive selection at the protein-  
121 level, at least not to the extent observed for other anti-retroviral restriction factors such  
122 as *TRIM5 $\alpha$*  or *BST-2* (38)

123         The goal of this study was to determine whether a potential membrane trafficking  
124 signal in SERINC5, reminiscent of an acidic cluster sorting motif, supported the activity  
125 of Nef. This sequence, EDTEE, is within the same cytoplasmic loop that has recently  
126 been shown to be a determinant of Nef-sensitivity (39). The hypothesis that this  
127 sequence would support Nef-activity is consistent with the roles of sequences  
128 reminiscent of sorting motifs in other Nef-targets, such as the key tyrosine in the  
129 cytoplasmic domain of the class I MHC  $\alpha$  chain and the di-leucine motif in the  
130 cytoplasmic domain of CD4 (8, 40, 41). Paradoxically, we found that rather than  
131 supporting Nef-activity, the EDTEE sequence instead provided a degree of protection  
132 against Nef: lack of the EDTEE sequence enhanced Nef-activity as an antagonist of  
133 SERINC5. The relatively increased infectivity of virions produced in the presence of Nef  
134 and SERINC5 lacking the EDTEE sequence correlated with more efficient exclusion of  
135 SERINC5 from virions and more efficient downregulation of cell surface SERINC5 by  
136 Nef. This enhanced-response phenotype appeared to be specific to Nef; deletion of the  
137 EDTEE sequence slightly impaired rather than enhanced the activity of glycoGag as an  
138 antagonist of SERINC5. We speculate that the EDTEE region may have specifically  
139 evolved to render Nef proteins less active SERINC5-antagonists.

## 140 **Materials and Methods**

141 *Cells:* HEK293 (obtained from Dr. Saswati Chatterjee) (42) and HeLa TZM-bl cells  
142 (obtained from Dr. John Kappes via the NIH AIDS Reagent Program) were cultured in  
143 DMEM media supplemented with 10% FBS and 1% Penicillin/Streptomycin. HeLa  
144 P4.R5 cells (obtained from Dr. Ned Landau) were maintained in DMEM media  
145 supplemented with 10% FBS, 1% Penicillin/Streptomycin, and 1 µg/ml puromycin. A  
146 leukemic T cell clone (Jurkat E6.1) lacking endogenous levels of SERINC3 and 5  
147 (termed JTA<sub>g</sub> S3/5 KO) was a gift from Dr. Heinrich Gottlinger. These cells were  
148 cultured in complete RPMI media: 10% FBS and 1% Penicillin/Streptomycin.

149 *Plasmids:* The proviral plasmids pNL4-3 and pNL4-3ΔNef have been described  
150 previously (21, 43, 44). The pNL4-3-derived plasmids lacking *env* ("DHIV") or lacking  
151 both *env* and *nef* genes ("DHIVΔNef") were gifts from Dr. Vicente Planelles (45). The  
152 plasmid pCINeo-VRE (pVRE) contains the sequence of NL4-3 from 9 bp upstream of  
153 the Rev start codon to the *Xho*I site in Nef (100 bp downstream of the Nef start codon),  
154 and encodes Vpu, Rev and Env. The empty vector pBJ5 and the pBJ5-HA-gg189  
155 plasmid containing an HA-tagged minimal active truncated form (the N-terminal 189  
156 residues) of MLV glycoGag were a gift from Dr. Massimo Pizzato. The plasmid pBJ5-  
157 SERINC5-iHA was a gift from Dr. Heinrich Gottlinger (28). This SERINC5 plasmid  
158 contains an HA tag located between residues 290 and 291 in extracellular loop 4 of the  
159 protein. pBJ5-SERINC5-iHA ΔEDTEE, pBJ5-SERINC5-iHA AATAA and pBJ5-  
160 SERINC5-iHA EDAEE, containing mutations within amino acids 364-368 in human  
161 SERINC5, were generated using site-directed mutagenesis (QuikChange, Agilent  
162 Technologies) using the following primers: for ΔEDTEE:

163 CTTCAGTCCTGGTGGACAGCAGCCGGGGAAG and CTTCCCCGGCTGCTGTCC-  
164 ACCAGGACTGAAG; for AATAA: GTCCTGGTGGAGCCGCCACTGCAGCG-  
165 CAGCAGCCG and CGGCTGCTGCGCTGCAGTGGCGGCTCCACCAGGAC; for  
166 EDAEE: CTGGTGGAGAGGACGCTGAAGAGCAGCAG and CTGCTGCTCTT-  
167 CAGCGTCCTCTCCACCAG. The plasmid pcDNA3.1-SERINC5-VN-HA was a gift from  
168 Dr. Yonghui Zheng (34) and was used for the Bi-molecular Fluorescence  
169 Complementation (BiFC) assays. We used the mutagenic primers above to construct  
170 pcDNA3.1-SERINC5 $\Delta$ EDTEE-VN-HA, pcDNA3.1-SERINC5 EDAEE-VN-HA and  
171 pcDNA3.1-SERINC5 AATAA-VN-HA. The plasmid pcDNA3.1-Nef<sub>SF2</sub>-V5-VC was a gift  
172 from Dr. Thomas Smithgall and has been described previously (46). To construct  
173 pcDNA3.1-Nef<sub>NL43</sub>-V5-VC or a myristoylation defective Nef (pcDNA3.1-Nef<sub>NL43</sub> G2A-V5-  
174 VC), a 621 bp PCR product bearing *NotI* and *EcoRI* restriction sites was generated  
175 using template plasmids containing the NL4-3 wildtype or mutant Nef alleles (pCI-NL)  
176 (24). The sense PCR primer for wildtype was AGATTCGCGGCCGC-  
177 ACCATGGGTGGCAAGTGGTCAAAAAG, whereas the sense PCR primer for G2A was  
178 AGATTCGCGGCCGCACCATGGCCGGCAAGT-GGTCAAAAAG; the antisense PCR  
179 primer was CCGGAGTACTTCAAGAACTGGAATTCTAAGCA. The purified PCR  
180 product and pcDNA3.1-Nef<sub>SF2</sub>-V5-VC were digested with *EcoRI* and *NotI* (NEB), and  
181 the DNA was isolated by column purification (Zymo Research). The digested  
182 pcDNA3.1-Nef<sub>SF2</sub>-V5-VC was treated with shrimp alkaline phosphatase (NEB), then  
183 ligated with the PCR products overnight at 16°C and transformed into TOP10  
184 competent cells (Thermo Fisher Scientific). Plasmid DNA was isolated from overnight  
185 bacterial cultures and verified via Sanger sequencing. For *in vitro* binding studies, HIV-



186 1 NL4-3 Nef (residues 25 to 206) was fused to either SERINC5 intracellular loop 4  
187 (ICL4; residues 332 to 387) or a SERINC5 ICL4  $\Delta$ EDTEE mutant using a long, flexible  
188 linker. The cDNAs were then cloned into an expression vector pMAT9s (Addgene  
189 Plasmid # 112590) using the *NcoI* and *HindIII* sites, fusing SERINC5 Nef-ICL4 to  
190 maltose binding protein (MBP-Nef-ICL4). MBP-Nef alone was cloned similarly.

191 *Expression, purification, and analysis of GST-SERINC3-Loop10, GST-SERINC5-ICL4,*  
192 *MBP- $\mu$ 1 and MBP- $\mu$ 2 proteins:* We previously reported expression, purification, and  
193 analysis of GST-SERINC3-Loop10 (a loop analogous to SERINC5 intracellular loop 4)  
194 (47). Here, we expressed, purified, and analyzed GST-SERINC5-ICL4 similarly.  
195 SERINC5-ICL4 was cloned into the pGEX4T1 Vector (GE Life Sciences) with an N-  
196 terminal GST tag, and the GST-SERINC5-ICL4 construct was transformed into *E.coli*  
197 BL21(DE) cells for protein expression. To express phosphorylated GST-SERINC5-ICL4,  
198 the construct was co-expressed with both the  $\alpha$  and  $\beta$ -subunits of Casein Kinase II (CK-  
199 II). The cells were grown to OD600 of  $\sim$ 0.6, induced with 0.1mM IPTG overnight at  
200 16°C, then collected by centrifugation. Cell pellets were lysed using a French press  
201 homogenizer. Lysates were clarified by centrifugation at 14,000 RPM. GST-SERINC5-  
202 ICL4 was purified using GST-affinity chromatography, HiPrep-Q anion exchange and  
203 S200pG chromatography. Purified GST-SERINC5-ICL4 co-expressed with CK-II was  
204 subjected to LC/MS and analyzed as previously reported (47). For the expression of  
205 MBP- $\mu$ 1 and MBP- $\mu$ 2, we used previously described constructs (48) encoding  
206 truncated versions of  $\mu$ 1 (residues 158-423) and  $\mu$ 2 (residues 159-435). These proteins  
207 were co-expressed with the pGro7 chaperone in BL21 cells, which was induced by  
208 1.5g/L L-(+)-arabinose at OD600 $\sim$ 0.2. To express MBP- $\mu$ 1 and MBP- $\mu$ 2, the cells were

209 further grown to OD<sub>600</sub>~0.6 and induced with 0.1mM IPTG overnight at 16°C. Cells  
210 were lysed using a French press homogenizer. The cell lysate was clarified by  
211 centrifugation at 14,000 RPM. The proteins were purified using His-Select Nickel affinity  
212 gel, Hi Prep-S cation exchange and S200pg gel-filtration chromatography.

213 *Recombinant Protein Expression for Nef-SERINC5-AP2 pulldowns:* For protein  
214 expression, *E. coli* BL21(DE3) cells were transformed with the MBP-Nef-ICL4 construct  
215 or mutant, grown to OD<sub>600</sub> ~ 0.8, induced with 0.3 mM IPTG, and expressed overnight at  
216 18°C. Cell pellets were harvested by centrifugation and flash-frozen in liquid nitrogen for  
217 storage. GST-tagged  $\mu$ 2<sub>CTD</sub>-truncated AP-2 was prepared as previously described (49):  
218 *E.coli* cells overexpressing all four AP-2 subunits were lysed by microfluidization, cell-  
219 debris removed by ultracentrifugation, and the supernatant applied to Ni-NTA agarose  
220 followed by glutathione-agarose affinity column (GSTrap HP, GE Healthcare). AP-2-  
221 containing fractions were pooled, concentrated, and dialyzed into glutathione-free buffer  
222 overnight. MBP-Nef and MBP-Nef-ICL4 proteins were purified by Ni-NTA agarose,  
223 anion exchange chromatography (HiTrap Q, GE Healthcare), and Superdex 200 size  
224 exclusion chromatography.

225 *GST-pulldowns using recombinant proteins.* Purified, GST-SERINC3-Loop10, GST-  
226 SERINC5-ICL4, MBP- $\mu$ 1 and MBP- $\mu$ 2 proteins were used for *in vitro* GST-pulldowns.  
227 An equimolar ratio of GST-tagged proteins were mixed with MBP- $\mu$ 1 or MBP- $\mu$ 2, and  
228 these mixtures were incubated with GST-resin overnight at 4°C. The next morning, the  
229 GST-resins were extensively washed with 20mM Tris-HCL pH 7.5 to remove unbound  
230 proteins. The GST-bound proteins were eluted with 10mM glutathione reduced in 50mM  
231 Tris HCL pH 8.0. The eluted fractions were analyzed by SDS-PAGE using Coomassie

232 Blue stain. For GST-tagged AP-2 pulldown assays, GST-tagged AP-2 (0.2 mg) and  
233 either MBP-tagged Nef or the Nef-ICL4 fusion proteins (0.4 mg, 5-fold molar excess)  
234 were mixed in a final volume of 100  $\mu$ L. Reaction mixtures were loaded onto small,  
235 gravity flow columns containing 0.2 mL glutathione Sepharose 4B resin (GE  
236 Healthcare), and incubated for 1 hour at 4°C. Protein mixtures and resin were washed  
237 extensively with 5x (400  $\mu$ L) GST binding buffer (50 mM Tris pH 8.0, 100 mM NaCl, 0.1  
238 mM TCEP), and bound protein complexes were eluted with 4x (200  $\mu$ L) GST elution  
239 buffer containing 10 mM reduced glutathione. Elution fractions were analyzed by SDS-  
240 PAGE and stained with Coomassie Blue.

241 *Measurement of Viral Infectivity:* Infectivity was measured in virions produced from  
242 HEK293 cells or Jurkat TAg *SERINC3/5* KO cells co-transfected with either an  
243 infectious molecular clone of HIV-1 (pNL4-3) or a mutant version harboring a deletion in  
244 the *nef* gene (pNL4-3 $\Delta$ Nef), and increasing concentrations of pBJ5-SERINC5-iHA or  
245 pBJ5-SERINC5-iHA  $\Delta$ EDTEE. HEK293 cells were seeded at a density of  $5 \times 10^5$   
246 cells/ml/well (12-well plates). The cells were transfected the following day with a total of  
247 1.6  $\mu$ g plasmid, comprising 1.3  $\mu$ g pNL4-3 or pNL4-3 $\Delta$ Nef, and increasing  
248 concentrations of SERINC5-iHA (as indicated), or empty plasmid (pBJ5), using  
249 Lipofectamine 2000 transfection reagent, according to the manufacturer's instructions  
250 (Thermo Fisher Scientific). For experiments including glycoGag (Figure 8), HEK293  
251 cells were transfected with a total of 1.6  $\mu$ g plasmid; 625 ng pNL4-3 $\Delta$ Env (Nef+) pNL4-  
252 3 $\Delta$ Env $\Delta$ Nef (Nef-), 325 ng pVRE (expressing Env), with or without 100 ng pBJ5-HA-  
253 gg189 (glycoGag), and increasing concentrations of SERINC5-iHA (as indicated), or  
254 empty plasmid (pBJ5). Cells and supernates were harvested after 24 hr.  $3.75 \times 10^5$

255 JTA<sub>g</sub> S3/5 KO cells in 2.5ml medium were co-transfected (Jurkat-In; MTI Global Stem)  
256 with a total of 1.25  $\mu$ g DNA, comprising 1  $\mu$ g pNL4-3 or pNL4-3 $\Delta$ Nef, and increasing  
257 concentrations of SERINC5-iHA (as indicated), or empty plasmid (pBJ5). Cells and  
258 supernates were harvested 48 hr post-transfection. For experiments comparing  
259 SERINC5 mutants, a single concentration of pBJ5-SERINC5-iHA, pBJ5-SERINC5-HA  
260  $\Delta$ EDTEE, pBJ5-SERINC5-iHA AATAA or pBJ5-SERINC5-iHA EDAEE was used (as  
261 indicated in the figure legends). Virions were harvested from supernates by  
262 centrifugation through a 20% sucrose cushion at 23,500  $\times$  g for 1 h at 4°C. The virus  
263 pellet was resuspended in culture medium and dilutions used to infect the reporter cell  
264 line HeLa P4.R5 in duplicate in a 48-well format. These cells express the HIV-1 co-  
265 receptors CD4 and CCR5 and possess a Tat-inducible  $\beta$ -galactosidase gene under the  
266 transcriptional control of the HIV-1 LTR. 48 hr post-infection, the cells were fixed with  
267 1% formaldehyde and 0.2% glutaraldehyde for 5 min at room temperature and then  
268 stained with 4 mM potassium ferrocyanide, 4 mM potassium ferricyanide, 2 mM MgCl<sub>2</sub>,  
269 and 0.4 mg/ml X-Gal (5-bromo-4-chloro-3-indolyl- $\beta$ -D-galactopyranoside) overnight.  
270 Infectious centers (IC) were imaged and quantified using image analysis software (50).  
271 The IC data were normalized to the concentration of p24 antigen in each viral stock  
272 measured by ELISA (ABL Bioscience). For experiments evaluating the activity of  
273 glycoGag, infectivity was measured using HeLa-TZM-bl cells, which contain a luciferase  
274 gene under the transcriptional control of the HIV-1 LTR. HeLa-TZM-bl cells were  
275 infected with diluted virus stock in duplicate wells of 96-well plates for 48 hours. The  
276 culture medium was removed, and the cells were lysed in luciferase reporter gene  
277 assay reagent (Britelite, Perkin Elmer); luciferase activity was measured using a

278 luminometer as relative light units (RLU), and normalized to the p24 concentration. To  
279 eliminate residual Nef-phenotype in the absence of transfected SERINC5-expression  
280 plasmids, the IC/ng p24 or relative light units RLU/ng p24 were expressed relative to the  
281 no-transfected-SERINC5 control for each viral genotype, setting the no-transfected-  
282 SERINC5 values to 100% for both wildtype and  $\Delta$ Nef in each experiment.

283 *SERINC5 Virion Incorporation and Western blots:* An aliquot of virions purified as  
284 described above was used to measure virion-incorporation of SERINC5. The samples  
285 of virions were lysed in 30  $\mu$ l 1x Laemmli Buffer containing 50 mM TCEP (tris(2-  
286 carboxyethyl) phosphine; Sigma) and subjected to standard SDS-PAGE after  
287 adjustment to equal amounts of p24, as measured by ELISA. Cellular samples from all  
288 experiments were lysed in extraction buffer (50mM NaCl, 1% Triton-X-100, 50mM Tris,  
289 pH 8.0), nuclei pelleted by centrifugation, and total protein concentration of supernatant  
290 was measured by BCA assay (Thermo Fisher Scientific). Equal protein concentrations  
291 were mixed with 2x Laemmli buffer containing 100 mM TCEP. To avoid boiling and  
292 consequent aggregation of SERINC5 (28, 29), the samples were sonicated (Diagenode  
293 Bioruptor) before protein separation by SDS/PAGE and Western blotting. The cell  
294 lysates and viral pellets were resolved on 10% denaturing SDS-PAGE gels, transferred  
295 onto polyvinylidene difluoride (PVDF) membranes, immunoblotted with the indicated  
296 antibodies, and visualized using Western Clarity detection reagent (Bio-Rad).  
297 Chemiluminescence was detected using a ChemiDoc Imager System (Bio-Rad).  
298 Primary and secondary antibodies were prepared in antibody dilution buffer, consisting  
299 of 2% milk in PBST (PBS with 0.02% Tween 20). The following antibodies were used for

300 detection of proteins of interest: HA.11 (mouse, Biolegend),  $\beta$ -actin (mouse, Sigma),  
301 GAPDH (mouse, Genetex), HIV-1 p24 (mouse, Millipore) and HIV-1 Nef (sheep) (51).  
302 *Flow Cytometry*: Surface SERINC5 was measured in HEK293 cells and JTA<sub>g</sub> S3/5 KO  
303 cells transfected to express pNL4-3 or pNL4-3 $\Delta$ Nef and pBJ5-SERINC5-iHA or the  
304 indicated mutants:  $\Delta$ EDTEE, EDAEE or AATAA. HEK293 cells were transfected with 1.6  
305  $\mu$ g total plasmid, 100 ng of which was pBJ5-SERINC5-iHA, and JTA<sub>g</sub> S3/5 KO cells  
306 were transfected with a total of 1.25  $\mu$ g plasmid, of which 250 ng was pBJ5-SERINC5-  
307 iHA. HEK293 cells were stained 24 hours post-transfection and JTA<sub>g</sub> S3/5 KO cells 48  
308 hours post-transfection. The cells were then washed with ice-cold FACS Buffer (1x  
309 PBS + 3% FBS) before staining with mouse anti-HA (diluted 1:200, Biolegend) for 30  
310 minutes on ice. The cells were pelleted by centrifugation and washed in FACS buffer  
311 before incubation with goat anti-mouse Alexa Fluor 647 (diluted 1:200, Biolegend) for 30  
312 minutes on ice. To detect intracellular p24, the cells were washed in FACS buffer and  
313 fixed and permeabilized with Cytotfix/Cytoperm reagent (BD Biosciences) and stained  
314 with an anti-p24 FITC antibody (clone KC57; Beckman Coulter) for 30 minutes on ice  
315 (diluted 1:100 in Perm wash buffer, BD Biosciences). The cells were washed with FACS  
316 buffer and PBS before analysis by flow cytometry. Surface SERINC fluorescence was  
317 quantified in at least  $1 \times 10^4$  p24-positive cells per condition. For the BiFC assays,  
318 HEK293 cells were transfected with 0.8  $\mu$ g of either a single Venus-N or Venus-C  
319 plasmid with an empty vector, or pairwise with Venus N- and C- terminal fusion proteins.  
320 Relative fluorescence intensity was measured in  $1 \times 10^4$  cells per condition, 24 hours  
321 after transfection. Data were collected on a BD Accuri C6 Cytometer and analyzed  
322 using C-Flow sampler (BD) and FlowJo (v10, FlowJo LLC) Software.

323 *Data Analysis and Presentation:*

324 Quantitative analyses were performed as described above. Replicate datasets were  
325 combined in Microsoft Excel and Graphpad Prism 5.0 software. Figures were produced  
326 using Adobe Photoshop and Adobe Illustrator (CS3) software.

327

328 **Results**

329 *The EDTEE sequence reduces the sensitivity of SERINC5 to HIV-1 Nef.*

330 An alignment between human and various primate SERINC5 proteins revealed a  
331 highly conserved acidic sequence (EDTEE; Figure 1) located in a long, predicted  
332 cytoplasmic loop (designated intra-cytoplasmic loop 4 (ICL4)). The EDTEE sequence is  
333 reminiscent of an acidic cluster membrane trafficking signal, therefore we hypothesized  
334 that it might be a Nef-response sequence and support Nef-activity. To test this, we co-  
335 transfected HEK293 cells or Jurkat TAg cells that lack endogenous SERINC3 and 5  
336 (*SERINC 3/5 KO*) with pNL4-3 (an HIV-1 infectious molecular clone) or its Nef-negative  
337 counterpart (pNL4-3  $\Delta$ Nef) along with increasing amounts of plasmids expressing either  
338 SERINC5-HA (pBJ5-SERINC5-iHA) or SERINC5-HA  $\Delta$ EDTEE (pBJ5-SERINC5-iHA  
339  $\Delta$ EDTEE). The virions produced were partially purified by centrifugation through a 20%  
340 sucrose cushion, and their infectivity was measured using an infectious center (IC)  
341 assay. The IC values were divided by the concentration of p24 capsid antigen, and the  
342 IC/p24 ratios were normalized to the "no-added SERINC5" control, setting that control  
343 value to 100% for both the wild type and the Nef-negative viruses. The latter  
344 normalization removed from the presented data differences between the infectivity of  
345 wild type and Nef-negative viruses that were not due to the experimental expression of

346 SERINC5 or related mutants by transfection. For our HEK293 cells, the *nef*-infectivity-  
347 phenotype in the absence of plasmid-mediated expression of SERINC5 was 6- to10-fold  
348 and was presumably due to the endogenous expression of SERINC family members  
349 (data not shown). For the Jurkat TAg *SERINC* 3/5 KO cells, the *nef*-infectivity-  
350 phenotype in the absence of plasmid-mediated expression of SERINC5 was  
351 approximately 2-fold, despite the genetic disruption of both *SERINC* family members  
352 with known anti-viral activity (data not shown).

353 As expected, we observed a dose dependent antiviral effect of SERINC5, which  
354 was greater when virions were produced in the absence of Nef (Figure 2A).  
355 Surprisingly, deletion of the EDTEE sequence enhanced the sensitivity of SERINC5 to  
356 Nef, but it did not affect the inhibitory activity of the protein in the absence of Nef (Figure  
357 2A). The difference in sensitivity to Nef was not clearly attributable to differences in  
358 SERINC5 protein expression within viral producer cells (Figure 2B, which shows a  
359 representative experiment in which Jurkat cells were used to produce virions). However,  
360 a subtle influence of the deletion on protein-expression was apparent in the dose-  
361 response western blot data: the  $\Delta$ EDTEE mutant seemed slightly underexpressed in the  
362 absence of Nef, although it was expressed equivalently to wild type SERINC5 in the  
363 presence of Nef. Consistent with the infectivity data, deletion of the EDTEE sequence  
364 caused substantially enhanced exclusion of SERINC5 from virions by Nef (Figure 2C,  
365 which again shows a representative experiment in which Jurkat cells were used to  
366 produce virions). Notably, we confirmed that a 55 kDa form of SERINC5, while the  
367 minority species in cells, is the predominant form in virions, an effect due to the  
368 selective incorporation into virions of a form of the protein modified by complex glycans



369 (52). Here, the data suggested that the  $\Delta$ EDTEE mutant might be slightly less efficiently  
370 incorporated into virions than wild type SERINC5 in the absence of Nef, although the  
371 difference is subtle. Overall, these data support the current model that Nef-mediated  
372 exclusion of SERINC5 from virions correlates with enhanced infectivity (28, 29). The  
373 data further indicate that the EDTEE sequence within SERINC5 provides a degree of  
374 resistance to Nef-activity; Nef is more active in the absence of this sequence.

375

376 *The EDTEE sequence is phosphorylated by casein kinase II in vitro but does not*  
377 *interact with the  $\mu$  subunit of AP-2.*

378 We reported recently that a phosphoserine acidic cluster (PSAC) motif of  
379 sequence SGASDEED is present in a cytoplasmic loop of SERINC3 analogous to the  
380 loop that contains the EDTEE sequence in SERINC5. Unlike the EDTEE sequence, the  
381 SGASDEED sequence has no impact on sensitivity to Nef, despite that the serines of  
382 this sequence are under positive selection (38, 47). The SGASDEED sequence of  
383 SERINC3 has potential as a membrane sorting or trafficking sequence, however,  
384 because it binds the medium ( $\mu$ ) subunits of AP-1 ( $\mu$ 1) and AP-2 ( $\mu$ 2) in a serine-  
385 phosphorylation dependent manner (47). Here we observed that when the recombinant  
386 SERINC5 loop containing the EDTEE sequence (ICL4) was co-expressed as a GST-  
387 fusion protein together with casein kinase II in *E.coli*, the threonine of the EDTEE  
388 sequence, as well as upstream serines in the loop, were phosphorylated (Figure 3A).  
389 Nonetheless, unlike the analogous loop of SERINC3, phosphorylated SERINC5 ICL4  
390 did not bind to recombinant  $\mu$ 2 *in vitro* (Figure 3B). These data indicate that although the

391 EDTEE sequence has the potential for threonine-phosphorylation, *in vitro* binding data  
392 do not support a role as a  $\mu$ -binding clathrin-adaptor sorting signal.

393

394 *The acidic residues within the EDTEE motif but not the threonine affect Nef-sensitivity.*

395 We next sought to determine whether the acidic nature of the SERINC5 EDTEE  
396 motif is the determinant of sensitivity to Nef. We created SERINC5 mutants that either  
397 lacked (EDTEE mutated to AATAA) or preserved (EDTEE mutated to EDAEE) acidic  
398 residues and tested their restrictive activity and sensitivity to Nef. SERINC5-AATAA,  
399 but not SERINC5-EDAEE, was characterized by a relatively enhanced sensitivity to Nef  
400 that was similar to the phenotype of SERINC5- $\Delta$ EDTEE in both HEK293 and JTA<sub>g</sub> S3/5  
401 KO cells (Figure 4A). All the SERINC5 mutants were as restrictive as the wild type  
402 protein; that is, they inhibited the infectivity of virions produced in the absence of Nef as  
403 effectively as wild type SERINC5, despite that the expression of the  $\Delta$ EDTEE and  
404 AATAA mutants (but not the EDAEE mutant) seemed slightly reduced. Overall, these  
405 data suggest that the relative acidity or negative charge of the SERINC5 EDTEE region  
406 affects sensitivity to Nef but not intrinsic restrictive activity. The data also indicate that  
407 the threonine alone is not a substantial determinant of sensitivity to Nef, even though it  
408 would contribute to the negative charge of the region if phosphorylated.

409

410 *Deletion of the EDTEE sequence enhances Nef's ability to downregulate SERINC5.*

411 Nef co-opts endocytic machinery, namely AP-2 and clathrin, to downregulate  
412 SERINC5 from the plasma membrane (28, 29). We reasoned based on our virologic  
413 data that the ability of Nef to downregulate SERINC5 would be increased by deletion of

414 the EDTEE sequence. To study the downregulation of cell surface SERINC5 by Nef, we  
415 co-transfected cells with pNL43 or pNL43 $\Delta$ Nef together with the SERINC5-iHA  
416 expression-plasmids and measured surface SERINC5 levels by immunofluorescent  
417 staining and flow cytometry. All of the SERINC5 constructs (wild type,  $\Delta$ EDTEE,  
418 AATAA, and EDAEE) were similarly expressed at the cell surface in Jurkat TAg  
419 *SERINC3/5* KO cells in the absence of Nef (Figure 5A, lower panel). SERINC5-  
420  $\Delta$ EDTEE and SERINC5-AATAA, but not SERINC5-EDAEE, were downregulated more  
421 efficiently than wild type SERINC5 in both JTAg S3/5 KO and HEK293 cells (Figure 5).  
422 These results are consistent with the virologic data and support the correlation between  
423 the downregulation of cell surface SERINC5 and the enhancement of infectivity by Nef.  
424 The data further support that the EDTEE sequence provides relative resistance to Nef-  
425 mediated modulation of SERINC5.

426

427 *Deletion of the SERINC5 EDTEE sequence does not enhance interaction with Nef.*

428 We used a recently reported bimolecular fluorescence complementation (BiFC)  
429 assay (34, 46) to test the hypothesis that the interaction of Nef and SERINC5 is  
430 enhanced in the absence of the EDTEE sequence. In this assay, the two proteins of  
431 interest are fused to either the N- or C-terminus of Venus (yellow fluorescent protein).  
432 A fluorescent signal is generated if the two proteins interact, enabling the quantitative  
433 measurement of protein-protein interactions within living cells. Here, we fused the N-  
434 terminus of Venus to the C-terminus of either wild-type NL4-3 Nef or a myristoylation-  
435 signal mutant incapable of associating with membranes (Nef G2A) (6). We also fused  
436 the C-terminus of Venus to the C-terminus of either SERINC5, SERINC5 $\Delta$ EDTEE,

437 SERINC5 EDAEE or SERINC5 AATAA. These constructs were used to transfect  
438 HEK293 cells either singly or in pairs, and the relative fluorescence was measured by  
439 flow cytometry twenty-four hours later. We detected modest fluorescence when only  
440 Nef-VN or SERINC5-VC was expressed and a 4-fold relative increase in fluorescence  
441 when these two proteins were co-expressed (Figure 6A). This increase of the  
442 fluorescent signal was lost when SERINC5-VC was paired with Nef-G2A-VN, consistent  
443 with the notion that Nef requires membrane-association to interact with SERINC5. We  
444 did not detect an increased interaction-signal when Nef-VN was paired with either  
445 SERINC5- $\Delta$ EDTEE-VC or SERINC5-AATAA-VC relative to SERINC5-VC (Figure 6A).  
446 No differences in the expression of these fusion proteins was detected by western blot  
447 (Figure 6B). These data suggest that deletion of the SERINC5 EDTEE sequence does  
448 not enhance its interaction with Nef.

449

450 *Deletion of the EDTEE sequence does not enhance binding of a Nef-SERINC5*  
451 *cytoplasmic loop fusion protein to AP-2 in vitro.*

452 We next sought to determine whether deletion of the EDTEE sequence  
453 enhances formation of a ternary complex including Nef, a cytoplasmic loop of SERINC5  
454 and AP-2. As noted above, a previous study showed that the long cytoplasmic loop  
455 within SERINC5 - ICL4 - confers Nef-responsiveness (39). Because ICL4 contains the  
456 EDTEE sequence, we produced recombinant proteins containing NL4-3 Nef (residues  
457 25-206) fused via a long flexible linker to either SERINC5 ICL4 (residues 332-387) or a  
458 SERINC5 ICL4  $\Delta$ EDTEE mutant (Figure 7A). A protein containing only the Nef  
459 component served as a control. Each of these proteins was fused to maltose-binding-

460 protein (MBP) to enhance their solubility. Binding of these proteins to a recombinant,  
461  $\mu$ 2<sub>CTD</sub>-truncated AP-2 heterotetramer *in vitro* was analyzed by pulldown assays using  
462 GST-tagged AP-2 mixed with either MBP-Nef, MBP-Nef-SERINC5 ICL4 or MBP-Nef  
463 SERINC5 ICL4  $\Delta$ EDTEE (Figure 7B). ICL4 strikingly stimulated the pulldown of Nef with  
464 the  $\mu$ 2<sub>CTD</sub>-truncated AP-2 complex, a result consistent with the notion that this  
465 cytoplasmic loop is a Nef-response sequence and that Nef and ICL4 together bind  
466 efficiently to AP-2. However, we detected little or no influence of the EDTEE sequence  
467 in this assay: the Nef-ICL4 fusion protein did not clearly bind more efficiently to AP-2  
468 when the EDTEE sequence was deleted (Figure 7B). These results suggest that the the  
469 EDTEE sequence does not interfere with formation of a Nef, SERINC5-ICL4, AP-2  
470 complex when assessed using recombinant proteins *in vitro*.

471

#### 472 *Role of the EDTEE sequence in the antagonism of SERINC5 by glycoGag.*

473 Based on our results with Nef, we hypothesized that the EDTEE sequence might  
474 affect the antagonism of SERINC5 by the glycosylated Gag (glycoGag) protein of  
475 Moloney murine leukemia virus (M-MLV). MLV glycoGag counteracts SERINC3 and 5  
476 and rescues infectivity of *nef*-deficient HIV-1 (35). The majority of the extracellular  
477 domain of M-MLV glycoGag is dispensable for this activity (53). We therefore used a  
478 minimal active truncated form of glycoGag which contains the N-terminal 189 residues  
479 (gg189) to test the ability of glycoGag to rescue the infectivity of HIV-1 lacking Nef  
480 in the presence of either SERINC5 or the SERINC5-mutant lacking the EDTEE  
481 sequence. For these experiments, HIV-1 Env was provided in *trans* in the virion-  
482 producer cells, in order to abrogate syncytia-formation in the target cells, which was

483 strikingly exaggerated when the absence of Nef was complimented by glycoGag  
484 and Env was encoded in the viral genome (data not shown). HeLa-TZM-bl indicator  
485 cells were used for luminometric measurement of infectivity, as this provided a more  
486 sensitive method for measuring the infectivity of the pseudo-virions. We confirmed that,  
487 as shown above, the EDTEE sequence provided relative resistance to Nef when  
488 infectivity was measured using this modified assay design (Figure 8). Moreover, as  
489 reported previously, glycoGag efficiently antagonized the activity of SERINC5 as an  
490 inhibitor of infectivity (Figure 8). Unlike Nef, however, the activity of glycoGag was  
491 not enhanced when the EDTEE sequence of SERINC5 was deleted. In contrast, the  
492 activity of glycoGag against the EDTEE-mutant was slightly diminished. These data  
493 suggest that the role of the EDTEE sequence in SERINC5 is Nef-specific, despite  
494 that the cellular cofactors involved in SERINC antagonism by Nef and glycoGag  
495 appear to be similar (28, 29, 53).

496

## 497 **Discussion**

498 We initially hypothesized that the acidic cluster within the long cytoplasmic loop of  
499 SERINC5 - the sequence EDTEE in ICL4 - might function as a protein sorting motif in  
500 concert with HIV-1 Nef, and thus support Nef-activity as a SERINC5-antagonist.  
501 Instead, our data indicate that Nef is more effective as a SERINC5-antagonist in the  
502 absence of the EDTEE sequence. A SERINC5 mutant lacking this sequence, or a  
503 mutant in which the acidic residues are replaced with alanines (but not a mutant in  
504 threonine is replaced with alanine), is more effectively antagonized by Nef at the levels  
505 of counteraction of SERINC5-mediated inhibition of infectivity, down-regulation of

506 SERINC5 from the cell surface, and exclusion of SERINC5 from virions. In general,  
507 these data are consistent with the current model of surface down-regulation and virion-  
508 exclusion of SERINC5 as the basis for Nef-mediated enhancement of infectivity, and  
509 they support the notion that the region of SERINC5 containing the EDTEE sequence  
510 determines Nef-sensitivity.

511 While our work was in progress, Dai and colleagues mapped the intracellular  
512 cytoplasmic loop that contains the EDTEE sequence (designated ICL4 in their study) as  
513 the key region of the protein required for sensitivity to Nef (39). These investigators  
514 identified two hydrophobic residues in the N-terminal half of the loop that are required  
515 for response to Nef. While our data are consistent with the conclusion that ICL4  
516 contains determinants of Nef-sensitivity, they reveal that in addition to residues that  
517 support Nef-activity, the loop also contains a sequence - EDTEE- that is inhibitory to  
518 Nef-activity.

519 Why would a cytoplasmic loop of SERINC5 contain such an inhibitory sequence?  
520 Although *SERINC5* does not seem to be under positive selection among primates, a  
521 genetic signature of host-pathogen conflict (38), we considered that the EDTEE  
522 sequence might have evolved to provide protection against diverse retroviruses and the  
523 SERINC antagonists that they encode. The retroviral accessory proteins Nef (found in  
524 HIVs and SIVs), glycoGag (found in MLV) and S2 (found in EIAV) are structurally  
525 unrelated proteins that all enhance viral infectivity by counteracting SERINC5 (28, 29,  
526 35, 36). However, our data indicate that the EDTEE sequence is not inhibitory to the  
527 activity of glycoGag, suggesting that the impact of this sequence is potentially Nef-  
528 specific. This scenario weighs against the notion that the protein acquired the EDTEE

529 sequence as a general defense against retroviral antagonists. It also implies that Nef  
530 has not yet optimally evolved to counteract SERINC5. Alternatively or in addition, the  
531 importance of other Nef-functions for viral fitness might preclude such evolution.

532         How does the EDTEE sequence affect Nef-responsiveness? One possible  
533 explanation is that the sequence is a membrane trafficking signal that directs SERINC5  
534 away from Nef. However, we found no evidence that deletion of the EDTEE sequence  
535 influences the subcellular localization of SERINC5 (data not shown), nor does the loop  
536 containing the EDTEE sequence bind the  $\mu$  subunit of the clathrin adaptor AP-2 *in vitro*,  
537 as the analogous loop of SERINC3 does.

538         Another possibility is that the negative charge of the EDTEE sequence inhibits  
539 the interaction with Nef. This model is consistent with the requirement of the acidic  
540 residues for this phenotype; it might also be consistent with the presence of an acidic  
541 cluster in the N-terminal region of Nef, which might repel SERINC5. However, our  
542 measurement of the SERINC5/Nef interaction using bi-molecular fluorescence  
543 complementation did not support this model: the interaction was unaffected by deletion  
544 of the EDTEE sequence. Moreover, a charge-repulsion model predicts that a Nef-  
545 mutant in which the acidic cluster is neutralized would be more active as an antagonist  
546 of wild type (EDTEE-motif containing) SERINC5, but we did not find that to be the case  
547 (data not shown).

548         Yet another possibility is that a subtle decrease in the steady-state expression of  
549 the  $\Delta$ EDTEE and AATAA mutants is sufficient to increase their apparent Nef-  
550 responsiveness. Several lines of evidence weigh against this possibility. First, the  
551 SERINC5 mutants appear to reach the plasma membrane, the presumed site of Nef



552 counteraction via endocytosis, as efficiently as the wild type protein (as measured by  
553 flow cytometry). Second, none of our data suggest that the intrinsic restrictive activities  
554 of the mutant proteins are decreased, weighing against the functional significance of the  
555 subtle differences detected in some of our western blots. Third, and perhaps most  
556 importantly, the  $\Delta$ EDTEE mutant was not more responsive than the wild type SERINC5  
557 to glycoGag; rather, the mutant appeared slightly less responsive. The observation that  
558 the effect of deleting the EDTEE sequence is opposite when testing responsiveness to  
559 Nef versus glycoGag is inconsistent with the notion that the observed virologic  
560 phenotypes are consequences of the levels of protein expression.

561         These considerations leave open the question of exactly how the EDTEE motif in  
562 SERINC5 specifically inhibits the activity of Nef as a SERINC5-antagonist. Although our  
563 binding experiments using recombinant proteins *in vitro* do not clearly support the  
564 hypothesis that the EDTEE sequence inhibits the interaction between Nef-SERINC5  
565 and the AP-2 clathrin adaptor complex, we have not yet attempted to assess this  
566 ternary interaction in the more complex environment of human cells. A structural  
567 explanation of the interaction between Nef, SERINC5 ICL4, and AP-2 might yet provide  
568 an answer for the currently enigmatic role of this motif.

569

## 570 **Acknowledgements**

571 The authors thank Dr. Massimo Pizzato for the pBJ5 and pBJ5-HA-gg189 plasmids; Dr.  
572 Heinrich Gottlinger for pBJ5-SERINC5-iHA plasmid and the *SERINC3/5* KO Jurkat TAG  
573 cell line; Dr. Yonghui Zheng for the plasmid pcDNA3.1-Serinc5-VN-HA; and Drs.  
574 Thomas Smithgall and Sherry Shu for the plasmid pcDNA3.1-Nef<sub>SF2</sub>-V5-VC. We thank

575 The Pendleton Charitable Trust for equipment. P.W.R. was supported by NIH grant

576 K12GM068524. This work was supported by NIH grant R01AI129706 to J.G.

577

578

579 **References**

- 580 1. Kirchhoff F. 2010. Immune evasion and counteraction of restriction factors by HIV-1  
581 and other primate lentiviruses. *Cell Host Microbe* 8:55–67.
- 582 2. Kim S, Ikeuchi K, Byrn R, Groopman J, Baltimore D. 1989. Lack of a negative  
583 influence on viral growth by the nef gene of human immunodeficiency virus type 1.  
584 *Proc Natl Acad Sci USA* 86:9544–9548.
- 585 3. Kirchhoff F, Greenough TC, Brettler DB, Sullivan JL, Desrosiers RC. 1995.  
586 Absence of Intact nef Sequences in a Long-Term Survivor with Nonprogressive  
587 HIV-1 Infection. *New England Journal of Medicine* 332:228–232.
- 588 4. Kestler HW, Ringler DJ, Mori K, Panicali DL, Sehgal PK, Daniel MD, Desrosiers  
589 RC. 1991. Importance of the nef gene for maintenance of high virus loads and for  
590 development of AIDS. *Cell* 65:651–662.
- 591 5. Klotman ME, Kim S, Buchbinder A, DeRossi A, Baltimore D, Wong-Staal F. 1991.  
592 Kinetics of expression of multiply spliced RNA in early human immunodeficiency  
593 virus type 1 infection of lymphocytes and monocytes. *Proc Natl Acad Sci USA*  
594 88:5011–5015.
- 595 6. Guy B, Kieny MP, Riviere Y, Le Peuch C, Dott K, Girard M, Montagnier L, Lecocq  
596 JP. 1987. HIV F/3' orf encodes a phosphorylated GTP-binding protein resembling  
597 an oncogene product. *Nature* 330:266–269.

- 598 7. Schwartz O, Maréchal V, Le Gall S, Lemonnier F, Heard JM. 1996. Endocytosis of  
599 major histocompatibility complex class I molecules is induced by the HIV-1 Nef  
600 protein. *Nat Med* 2:338–342.
- 601 8. Aiken C, Konner J, Landau NR, Lenburg ME, Trono D. 1994. Nef induces CD4  
602 endocytosis: requirement for a critical dileucine motif in the membrane-proximal  
603 CD4 cytoplasmic domain. *Cell* 76:853–864.
- 604 9. Piguet V, Gu F, Foti M, Demarex N, Gruenberg J, Carpentier JL, Trono D. 1999.  
605 Nef-induced CD4 degradation: a diacidic-based motif in Nef functions as a  
606 lysosomal targeting signal through the binding of beta-COP in endosomes. *Cell*  
607 97:63–73.
- 608 10. Chaudhuri R, Lindwasser OW, Smith WJ, Hurley JH, Bonifacino JS. 2007.  
609 Downregulation of CD4 by human immunodeficiency virus type 1 Nef is dependent  
610 on clathrin and involves direct interaction of Nef with the AP2 clathrin adaptor. *J*  
611 *Virology* 81:3877–3890.
- 612 11. daSilva LLP, Sougrat R, Burgos PV, Janvier K, Mattera R, Bonifacino JS. 2009.  
613 Human Immunodeficiency Virus Type 1 Nef Protein Targets CD4 to the  
614 Multivesicular Body Pathway. *Journal of Virology* 83:6578–6590.
- 615 12. Willey RL, Maldarelli F, Martin MA, Strebel K. 1992. Human immunodeficiency  
616 virus type 1 Vpu protein regulates the formation of intracellular gp160-CD4  
617 complexes. *J Virol* 66:226–234.

- 618 13. Willey RL, Maldarelli F, Martin MA, Strebel K. 1992. Human immunodeficiency  
619 virus type 1 Vpu protein induces rapid degradation of CD4. *J Virol* 66:7193–7200.
- 620 14. Wildum S, Schindler M, Münch J, Kirchhoff F. 2006. Contribution of Vpu, Env, and  
621 Nef to CD4 down-modulation and resistance of human immunodeficiency virus  
622 type 1-infected T cells to superinfection. *J Virol* 80:8047–8059.
- 623 15. Ross TM, Oran AE, Cullen BR. 1999. Inhibition of HIV-1 progeny virion release by  
624 cell-surface CD4 is relieved by expression of the viral Nef protein. *Curr Biol* 9:613–  
625 621.
- 626 16. Pham TNQ, Lukhele S, Hajjar F, Routy J-P, Cohen ÉA. 2014. HIV Nef and Vpu  
627 protect HIV-infected CD4+ T cells from antibody-mediated cell lysis through down-  
628 modulation of CD4 and BST2. *Retrovirology* 11:15.
- 629 17. Veillette M, Désormeaux A, Medjahed H, Gharsallah N-E, Coutu M, Baalwa J,  
630 Guan Y, Lewis G, Ferrari G, Hahn BH, Haynes BF, Robinson JE, Kaufmann DE,  
631 Bonsignori M, Sodroski J, Finzi A. 2014. Interaction with cellular CD4 exposes HIV-  
632 1 envelope epitopes targeted by antibody-dependent cell-mediated cytotoxicity. *J*  
633 *Virol* 88:2633–2644.
- 634 18. Roeth JF, Williams M, Kasper MR, Filzen TM, Collins KL. 2004. HIV-1 Nef disrupts  
635 MHC-I trafficking by recruiting AP-1 to the MHC-I cytoplasmic tail. *J Cell Biol*  
636 167:903–913.

- 637 19. Blagoveshchenskaya AD, Thomas L, Feliciangeli SF, Hung CH, Thomas G. 2002.  
638 HIV-1 Nef downregulates MHC-I by a PACS-1- and PI3K-regulated ARF6  
639 endocytic pathway. *Cell* 111:853–866.
- 640 20. Collins KL, Chen BK, Kalams SA, Walker BD, Baltimore D. 1998. HIV-1 Nef protein  
641 protects infected primary cells against killing by cytotoxic T lymphocytes. *Nature*  
642 391:397–401.
- 643 21. Chowes MY, Spina CA, Kwoh TJ, Fitch NJ, Richman DD, Guatelli JC. 1994.  
644 Optimal infectivity in vitro of human immunodeficiency virus type 1 requires an  
645 intact nef gene. *J Virol* 68:2906–2914.
- 646 22. Münch J, Rajan D, Schindler M, Specht A, Rücker E, Novembre FJ, Nerrienet E,  
647 Müller-Trutwin MC, Peeters M, Hahn BH, Kirchhoff F. 2007. Nef-mediated  
648 enhancement of virion infectivity and stimulation of viral replication are fundamental  
649 properties of primate lentiviruses. *J Virol* 81:13852–13864.
- 650 23. Carl S, Greenough TC, Krumbiegel M, Greenberg M, Skowronski J, Sullivan JL,  
651 Kirchhoff F. 2001. Modulation of different human immunodeficiency virus type 1  
652 Nef functions during progression to AIDS. *J Virol* 75:3657–3665.
- 653 24. Craig HM, Pandori MW, Guatelli JC. 1998. Interaction of HIV-1 Nef with the cellular  
654 dileucine-based sorting pathway is required for CD4 down-regulation and optimal  
655 viral infectivity. *Proc Natl Acad Sci USA* 95:11229–11234.

- 656 25. Pizzato M, Helander A, Popova E, Calistri A, Zamborlini A, Palù G, Göttlinger HG.  
657 2007. Dynamin 2 is required for the enhancement of HIV-1 infectivity by Nef. Proc  
658 Natl Acad Sci USA 104:6812–6817.
- 659 26. Miller MD, Warmerdam MT, Page KA, Feinberg MB, Greene WC. 1995. Expression  
660 of the human immunodeficiency virus type 1 (HIV-1) nef gene during HIV-1  
661 production increases progeny particle infectivity independently of gp160 or viral  
662 entry. J Virol 69:579–584.
- 663 27. Aiken C, Trono D. 1995. Nef stimulates human immunodeficiency virus type 1  
664 proviral DNA synthesis. J Virol 69:5048–5056.
- 665 28. Usami Y, Wu Y, Göttlinger HG. 2015. SERINC3 and SERINC5 restrict HIV-1  
666 infectivity and are counteracted by Nef. Nature 526:218–223.
- 667 29. Rosa A, Chande A, Ziglio S, De Sanctis V, Bertorelli R, Goh SL, McCauley SM,  
668 Nowosielska A, Antonarakis SE, Luban J, Santoni FA, Pizzato M. 2015. HIV-1 Nef  
669 promotes infection by excluding SERINC5 from virion incorporation. Nature  
670 526:212–217.
- 671 30. Usami Y, Göttlinger H. 2013. HIV-1 Nef responsiveness is determined by Env  
672 variable regions involved in trimer association and correlates with neutralization  
673 sensitivity. Cell Rep 5:802–812.
- 674 31. Inuzuka M, Hayakawa M, Ingi T. 2005. Serinc, an activity-regulated protein family,  
675 incorporates serine into membrane lipid synthesis. J Biol Chem 280:35776–35783.

- 676 32. Trautz B, Wiedemann H, Lüchtenborg C, Pierini V, Kranich J, Glass B, Kräusslich  
677 H-G, Brocker T, Pizzato M, Ruggieri A, Brügger B, Fackler OT. 2017. The host-cell  
678 restriction factor SERINC5 restricts HIV-1 infectivity without altering the lipid  
679 composition and organization of viral particles. *J Biol Chem* 292:13702–13713.
- 680 33. Sood C, Marin M, Chande A, Pizzato M, Melikyan GB. 2017. SERINC5 protein  
681 inhibits HIV-1 fusion pore formation by promoting functional inactivation of  
682 envelope glycoproteins. *J Biol Chem* 292:6014–6026.
- 683 34. Shi J, Xiong R, Zhou T, Su P, Zhang X, Qiu X, Li H, Li S, Yu C, Wang B, Ding C,  
684 Smithgall TE, Zheng Y-H. 2018. HIV-1 Nef Antagonizes SERINC5 Restriction by  
685 Downregulation of SERINC5 via the Endosome/Lysosome System. *J Virol* 92.
- 686 35. Pizzato M. 2010. MLV glycosylated-Gag is an infectivity factor that rescues Nef-  
687 deficient HIV-1. *Proc Natl Acad Sci USA* 107:9364–9369.
- 688 36. Chande A, Cuccurullo EC, Rosa A, Ziglio S, Carpenter S, Pizzato M. 2016. S2 from  
689 equine infectious anemia virus is an infectivity factor which counteracts the  
690 retroviral inhibitors SERINC5 and SERINC3. *Proc Natl Acad Sci USA* 113:13197–  
691 13202.
- 692 37. Li S, Ahmad I, Shi J, Wang B, Yu C, Zhang L, Zheng Y-H. 2018. Murine leukemia  
693 virus glycosylated Gag reduces murine SERINC5 protein expression at steady-  
694 state levels via endosome/lysosome pathway to counteract the SERINC5  
695 antiretroviral activity. *J Virol*.



- 696 38. Murrell B, Vollbrecht T, Guatelli J, Wertheim JO. 2016. The Evolutionary Histories  
697 of Antiretroviral Proteins SERINC3 and SERINC5 Do Not Support an Evolutionary  
698 Arms Race in Primates. *Journal of Virology* 90:8085–8089.
- 699 39. Dai W, Usami Y, Wu Y, Göttlinger H. 2018. A Long Cytoplasmic Loop Governs the  
700 Sensitivity of the Anti-viral Host Protein SERINC5 to HIV-1 Nef. *Cell Rep* 22:869–  
701 875.
- 702 40. Le Gall S, Erdtmann L, Benichou S, Berlioz-Torrent C, Liu L, Benarous R, Heard  
703 JM, Schwartz O. 1998. Nef interacts with the mu subunit of clathrin adaptor  
704 complexes and reveals a cryptic sorting signal in MHC I molecules. *Immunity*  
705 8:483–495.
- 706 41. Jia X, Singh R, Homann S, Yang H, Guatelli J, Xiong Y. 2012. Structural basis of  
707 evasion of cellular adaptive immunity by HIV-1 Nef. *Nat Struct Mol Biol* 19:701–  
708 706.
- 709 42. Chatterjee S, Johnson PR, Wong KK. 1992. Dual-target inhibition of HIV-1 in vitro  
710 by means of an adeno-associated virus antisense vector. *Science* 258:1485–1488.
- 711 43. Adachi A, Gendelman HE, Koenig S, Folks T, Willey R, Rabson A, Martin MA.  
712 1986. Production of acquired immunodeficiency syndrome-associated retrovirus in  
713 human and nonhuman cells transfected with an infectious molecular clone. *J Virol*  
714 59:284–291.

- 715 44. Spina CA, Kwoh TJ, Chowes MY, Guatelli JC, Richman DD. 1994. The importance  
716 of nef in the induction of human immunodeficiency virus type 1 replication from  
717 primary quiescent CD4 lymphocytes. *J Exp Med* 179:115–123.
- 718 45. Ramirez PW, DePaula-Silva AB, Szaniawski M, Barker E, Bosque A, Planelles V.  
719 2015. HIV-1 Vpu utilizes both cullin-RING ligase (CRL) dependent and  
720 independent mechanisms to downmodulate host proteins. *Retrovirology* 12:65.
- 721 46. Shu ST, Emert-Sedlak LA, Smithgall TE. 2017. Cell-based Fluorescence  
722 Complementation Reveals a Role for HIV-1 Nef Protein Dimerization in AP-2  
723 Adaptor Recruitment and CD4 Co-receptor Down-regulation. *J Biol Chem*  
724 292:2670–2678.
- 725 47. Singh R, Stoneham C, Lim C, Jia X, Guenaga J, Wyatt R, Wertheim JO, Xiong Y,  
726 Guatelli J. 2018. Phosphoserine acidic cluster motifs bind distinct basic regions on  
727 the  $\mu$  subunits of clathrin adaptor protein complexes. *J Biol Chem*.
- 728 48. Jia X, Weber E, Tokarev A, Lewinski M, Rizk M, Suarez M, Guatelli J, Xiong Y.  
729 2014. Structural basis of HIV-1 Vpu-mediated BST2 antagonism via hijacking of the  
730 clathrin adaptor protein complex 1. *eLife* 3.
- 731 49. Jackson LP, Kelly BT, McCoy AJ, Gaffry T, James LC, Collins BM, Höning S,  
732 Evans PR, Owen DJ. 2010. A Large-Scale Conformational Change Couples  
733 Membrane Recruitment to Cargo Binding in the AP2 Clathrin Adaptor Complex.  
734 *Cell* 141:1220–1229.

- 735 50. Day JR, Martínez LE, Šášík R, Hitchin DL, Dueck ME, Richman DD, Guatelli JC.  
736 2006. A computer-based, image-analysis method to quantify HIV-1 infection in a  
737 single-cycle infectious center assay. *Journal of Virological Methods* 137:125–133.
- 738 51. Pandori MW, Fitch NJ, Craig HM, Richman DD, Spina CA, Guatelli JC. 1996.  
739 Producer-cell modification of human immunodeficiency virus type 1: Nef is a virion  
740 protein. *J Virol* 70:4283–4290.
- 741 52. Sharma S, Lewinski MK, Guatelli J. 2018. An N-Glycosylated Form of SERINC5 Is  
742 Specifically Incorporated into HIV-1 Virions. *J Virol* 92.
- 743 53. Usami Y, Popov S, Göttlinger HG. 2014. The Nef-like effect of murine leukemia  
744 virus glycosylated gag on HIV-1 infectivity is mediated by its cytoplasmic domain  
745 and depends on the AP-2 adaptor complex. *J Virol* 88:3443–3454.
- 746
- 747
- 748

749 **Figure Legends**

750

751 **Figure 1: An acidic cluster motif (EDTEE) is highly conserved within human and**  
752 **non-human primate SERINC5.** A.) Predicted topology of SERINC5 showing ten  
753 transmembrane domains and six cytoplasmic domains, four of which form loops. The  
754 EDTEE sequence is shown in red and is found within the long cytoplasmic loop-4 (ICL-  
755 4). B.) Amino-acid sequence alignment of SERINC5 ICL-4. The human sequence, the  
756 sequences of several non-human primates, and the murine sequence are shown. The  
757 conserved EDTEE acidic cluster motif is shown in red.

758

759 **Figure 2: The EDTEE sequence within SERINC5 is not necessary for antiviral**  
760 **activity but confers relative resistance to Nef.** A.) HEK293 cells or Jurkat TAg cells  
761 lacking SERINC3 and 5 (JTA<sub>g</sub> S3/5 KO) were transfected to express NL4-3 (WT) or a  
762 *nef*-negative mutant (NL4-3 $\Delta$ Nef) and increasing doses of SERINC5-HA or a mutant  
763 lacking the acidic cluster motif (SERINC5-iHA $\Delta$ EDTEE), as indicated. The produced  
764 virions were partially purified by centrifugation through a sucrose cushion and used to  
765 infect HeLa P4.R5 cells, which express an LTR- $\beta$ -galactosidase indicator. Forty-eight  
766 hours later, the cells were stained with X-gal, and infectious centers (IC) imaged and  
767 quantified. The IC/ml were divided by the concentration (ng/ml) of p24 antigen  
768 measured in the virion-preparations by ELISA. The infectious centers per nanogram  
769 (IC/ng) were normalized to the no-added-SERINC5 control for each viral genotype (wild  
770 type: "+ Nef" or Nef-negative: "- Nef". Data are presented as the mean percentage  
771 relative infectivity, error bars are the standard deviation (s.d.) from  $n=2$  (HEK293 cells)

772 and  $n=3$  (JTA<sub>g</sub> S3/5 KO cells) experiments. B.) Protein from whole JTA<sub>g</sub> S3/5 KO cell  
773 lysates from the experiment of panel A were subjected to SDS-PAGE and Western  
774 blotting. Membranes were probed with antibodies to detect SERINC5 (HA), Nef, p24,  
775 and  $\beta$ -actin. C.) Virions produced by JTA<sub>g</sub> S3/5 KO cells and analyzed in the  
776 experiment of panel A were normalized by p24 content before SDS-PAGE. Membranes  
777 were probed for p24/55, Nef, and SERINC5 (HA). Nef is cleaved within virions by the  
778 viral protease, yielding a 16 kDa C-terminal product (51).

779

780 **Figure 3: Phosphorylated SERINC5-ICL4 does not bind directly to the medium ( $\mu$ )**  
781 **subunit of AP-2.** A) Sequence of SERINC5-ICL4. GST-SERINC5-ICL4 was co-  
782 expressed with casein kinase II (CK-II) in *E.coli*, purified, and analyzed by liquid  
783 chromatography/mass spectrometry (LC/MS). Phospho-peptide sequences are shown,  
784 and sites of serine-threonine (ST) phosphorylation are highlighted in red and the residue  
785 locations are indicated. Mascot scores for the peptide matches are shown. B) Serinc5-  
786 ICL4 does not bind to  $\mu$ 2. GST-SERINC3 loop 10 (a positive control) and GST-  
787 SERINC5-ICL4 fusion proteins were expressed in *E. coli* either with or without CK-II and  
788 tested for binding to  $\mu$ 2 in GST-pulldown assays. The  $\mu$ 2 protein is N-terminally  
789 truncated and fused to maltose binding protein (MBP) as a solubility tag. SDS/PAGE  
790 gels were stained with Coomassie Blue.

791

792 **Figure 4: The acidic residues within the SERINC5 EDTEE sequence, but not the**  
793 **threonine, are important for resistance to Nef.** A.) HEK293 cells or JTA<sub>g</sub> S3/5 KO  
794 cells were transfected with pNL4-3 or pNL4-3 $\Delta$ Nef and indicated amounts of plasmid

795 expressing either WT SERINC5 or the following mutants:  $\Delta$ EDTEE, EDAEE, or AATAA.  
796 Virions were harvested and infectivity assays performed in HeLa P4.R5 cells, as  
797 described in Figure 2. The infectious centers per nanogram (IC/ng) were normalized to  
798 the no-added-SERINC5 control for each viral genotype. Data are presented as the  
799 mean percentage relative infectivity, error bars are the s.d. from  $n=2$  (HEK293 cells) and  
800  $n=3$  (JTA<sub>g</sub> S3/5 KO cells) experiments. B.) Protein derived from whole JTA<sub>g</sub> S3/5 KO  
801 cell lysates from the experiment of A were subjected to SDS-PAGE and Western  
802 blotting. Membranes were probed with antibodies to detect SERINC5 (HA), Nef, p24/55,  
803 and GAPDH.

804

805 **Figure 5: Mutation of the EDTEE sequence enhances the downregulation of**  
806 **SERINC5 from the cell surface by Nef.** JTA<sub>g</sub> S3/5 KO or HEK293 cells were  
807 transfected with pNL4-3 (+ Nef) or pNL4-3 $\Delta$ Nef (- Nef) and either 250 ng (JTA<sub>g</sub> S3/5  
808 KO) or 100ng (HEK293) of plasmid expressing WT SERINC5 or the EDTEE mutants:  
809  $\Delta$ EDTEE, EDAEE, or AATAA. The cells were stained for surface SERINC5 (HA, Alexa  
810 Fluor-647) and intracellular p24 (FITC). A.) Representative two-color dot-plots showing  
811 surface expression of SERINC5 (HA) in p24-positive JTA<sub>g</sub> S3/5 KO cells (+/- Nef). B.)  
812 The MFI of surface SERINC5 (HA) in p24-positive cells was quantified +/- Nef. Data are  
813 presented as mean percentage MFI normalized to no-Nef control, error bars are the s.d.  
814 of  $n=2$  (JTA<sub>g</sub> S3/5 KO cells) or  $n=4$  (HEK293 cells) experiments.

815

816 **Figure 6: Intracellular interaction between Nef and SERINC5 as measured by**  
817 **bimolecular fluorescence complementation (BiFC) is not substantially affected by**

818 **the EDTEE sequence.** A.) HEK293 cells were transfected with plasmid constructs  
819 expressing Nef-Venus-C (VC), Nef G2A-VC, SERINC5-Venus-N (VN),  
820 SERINC5 $\Delta$ EDTEE-VN, SERINC5 EDAEE-VN or SERINC5 AATAA-VN either singly or  
821 in the pairs indicated. Twenty-four hours later, the fluorescence intensity (FL1) was  
822 measured by flow cytometry. The data are presented as the mean fluorescence  
823 intensity of Venus signal, error bars are s.d. for  $n=3$  independent experiments. B.)  
824 Protein from whole cell lysates from a representative experiment was subjected to SDS-  
825 PAGE and Western Blotting. Membranes were probed with anti-V5 (Nef-VC), HA  
826 (SERINC5-VN) or GAPDH (loading control) antibodies.

827

828 **Figure 7: SERINC5 (ICL4) stimulates the interaction of Nef with AP-2 *in vitro***  
829 **independently of the EDTEE sequence.** A.) Schematic of recombinant protein  
830 constructs used to study formation of a Nef-SERINC5 ICL4 complex *in vitro*. A  
831 heterotetrameric AP-2 complex core with a GST tag on the  $\alpha$  subunit; the C-terminal  
832 two-thirds of the  $\mu$ 2 subunit is deleted, as are the appendage domains of the  $\alpha$  and  $\beta$ 2  
833 subunits. Nef was fused to SERINC5 ICL4 (with or without the EDTEE sequence) via a  
834 linker peptide; these proteins were further fused to the maltose-binding-protein (MBP)  
835 as a solubility tag (not shown). MBP-Nef alone was used as a control. B.) GST-  
836 pulldown assay assessing the binding of Nef-SERINC ICL4 (with or without the EDTEE  
837 sequence) or Nef alone to the truncated AP2 core *in vitro*. The input protein mixtures,  
838 the protein(s) washed through the GST-matrix, and the protein(s) that remained bound  
839 to the GST-matrix were run on an SDS/PAGE gel and stained with Coomassie Blue.

840

841 **Figure 8: Deletion of the EDTEE sequence does not enhance the activity of MLV**  
842 **GlycoGag as an antagonist of SERINC5.** A.) HEK293 cells were co-transfected with  
843 plasmid constructs encoding indicated amounts of SERINC5-iHA and either *env*- and  
844 *nef*-deficient (Nef -), or *env*- deficient (Nef +) HIV-1 provirus. Env expression was  
845 provided in *trans* by an NL4-3-derived construct (pVRE). An HA-tagged minimal active  
846 glycoGag (HA-gg-189) was also provided in *trans*. Virions were harvested twenty-four  
847 hours post-transfection, partially purified by centrifugation through a sucrose cushion,  
848 and used to infect HeLa-TZM-bl luciferase indicator cells. Luciferase activity was  
849 measured 48 hr post-infection and normalized to p24 antigen (relative light units,  
850 RLU/ng p24). Data are expressed as percentage infectivity relative to the no added  
851 SERINC control for each condition (with or without Nef or glycoGag). Error bars indicate  
852 standard deviation for  $n=2$  independent experiments. (B) Comparison of relative  
853 infectivity of virions in absence or presence of 100 ng SERINC5-iHA ( $p$ -values derived  
854 from Student's  $t$ -test are indicated). (C) Protein from whole cell lysates was subject to  
855 SDS-PAGE and Western blotting. Membranes were probed with antibodies to detect  
856 SERINC5 (HA), glycoGag (gg189, HA), Nef, p55 (Gag), and GAPDH.  
857



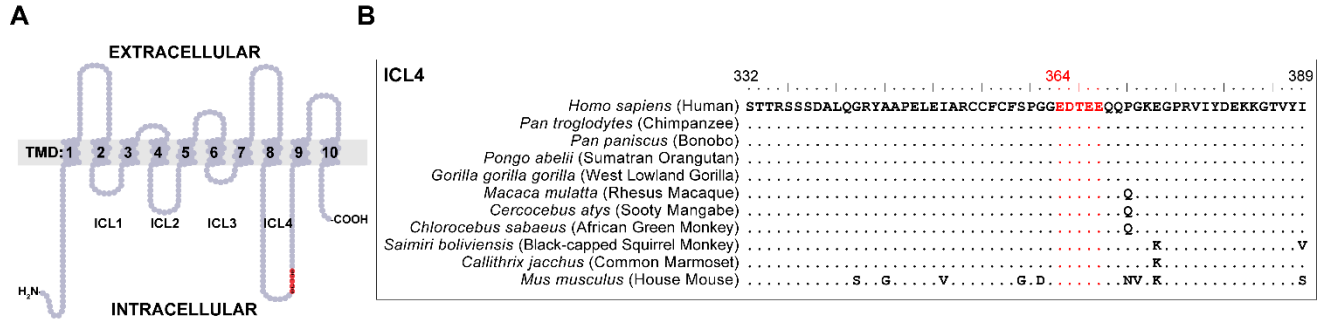

858

859

860 **FIGURE 1**

861

862

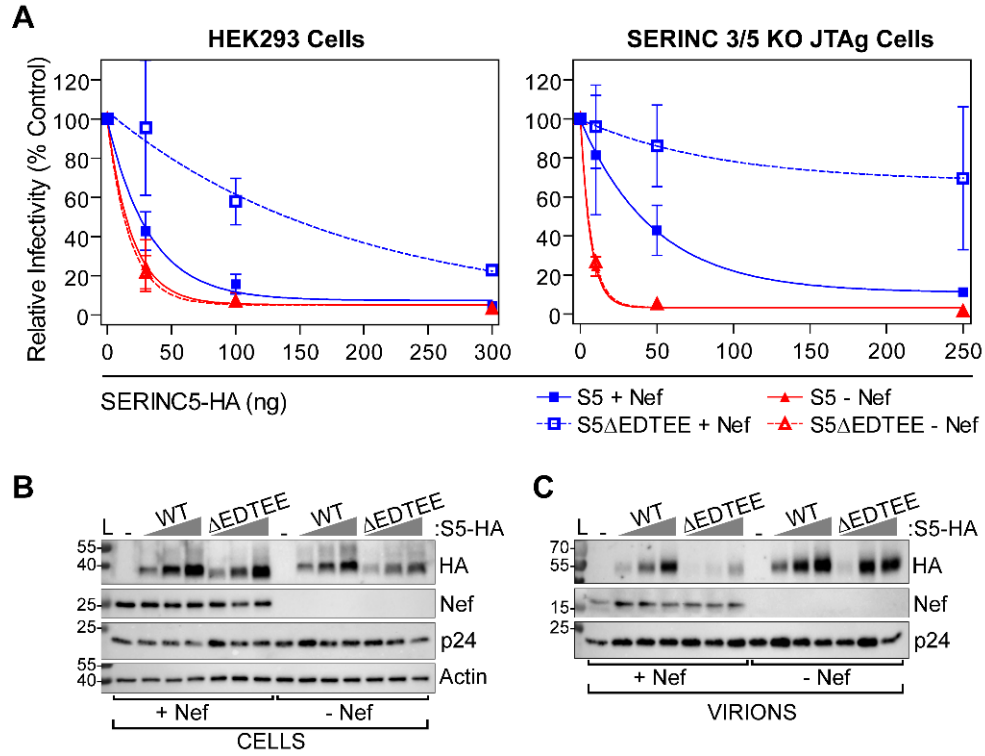

863  
864  
865  
866  
867

**FIGURE 2**

**A**

**SERINC5 ICL4:**

<sup>332</sup>**S****I****T****R****S****S****S**DALQGRYAAPELEIARCCFCFSPGGED**I**EEQQPGKEGPRVIYDEKKGTVY**I**<sub>389</sub>

| LCMS Phosphopeptide                                                                                  | Location | Mascot score |
|------------------------------------------------------------------------------------------------------|----------|--------------|
| ED <b>I</b> EEQQPGKEGPRVIYD + Phospho (ST)                                                           | 366      | 35.5         |
| <b>S</b> <u><b>I</b></u> <b>T</b> <u><b>R</b></u> <b>S</b> <u><b>S</b></u> <b>S</b> D + Phospho (ST) | 333      | 29.9         |
| <b>S</b> <u><b>T</b></u> <b>I</b> <u><b>R</b></u> <b>S</b> <u><b>S</b></u> <b>S</b> D + Phospho (ST) | 334      | 25.0         |
| ST <b>T</b> <u><b>R</b></u> <b>S</b> <u><b>S</b></u> <b>S</b> D + Phospho (ST)                       | 337      | 22.5         |

868

869

870 **FIGURE 3**

**B**

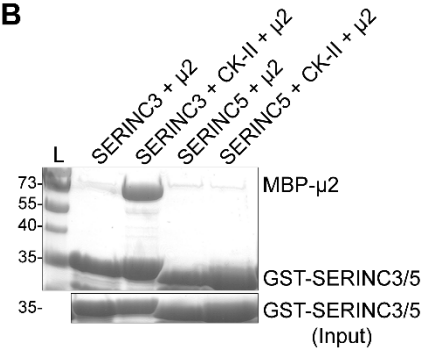

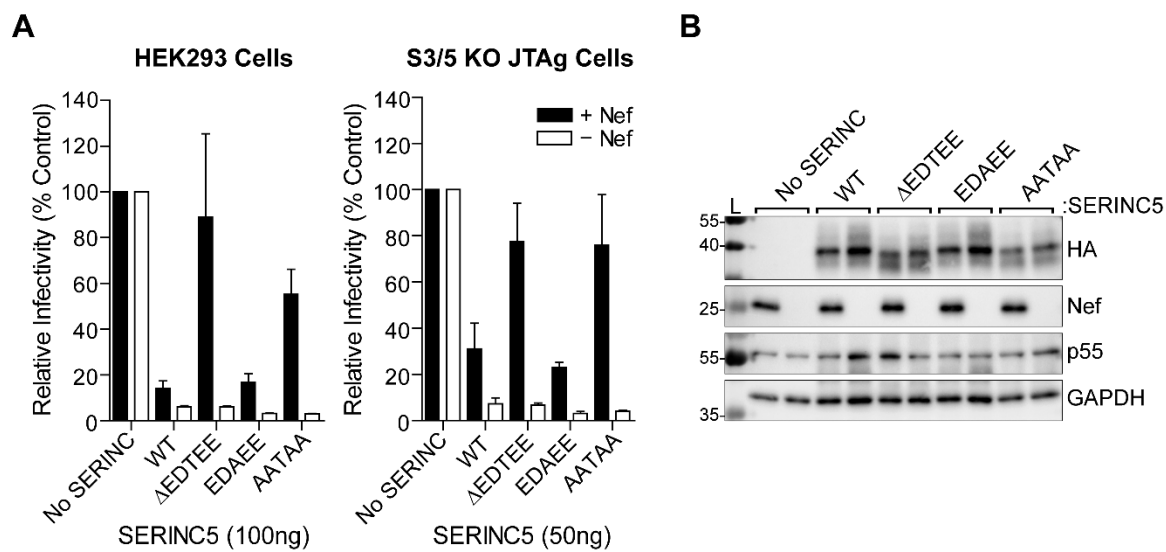

871

872

873 **FIGURE 4**

874

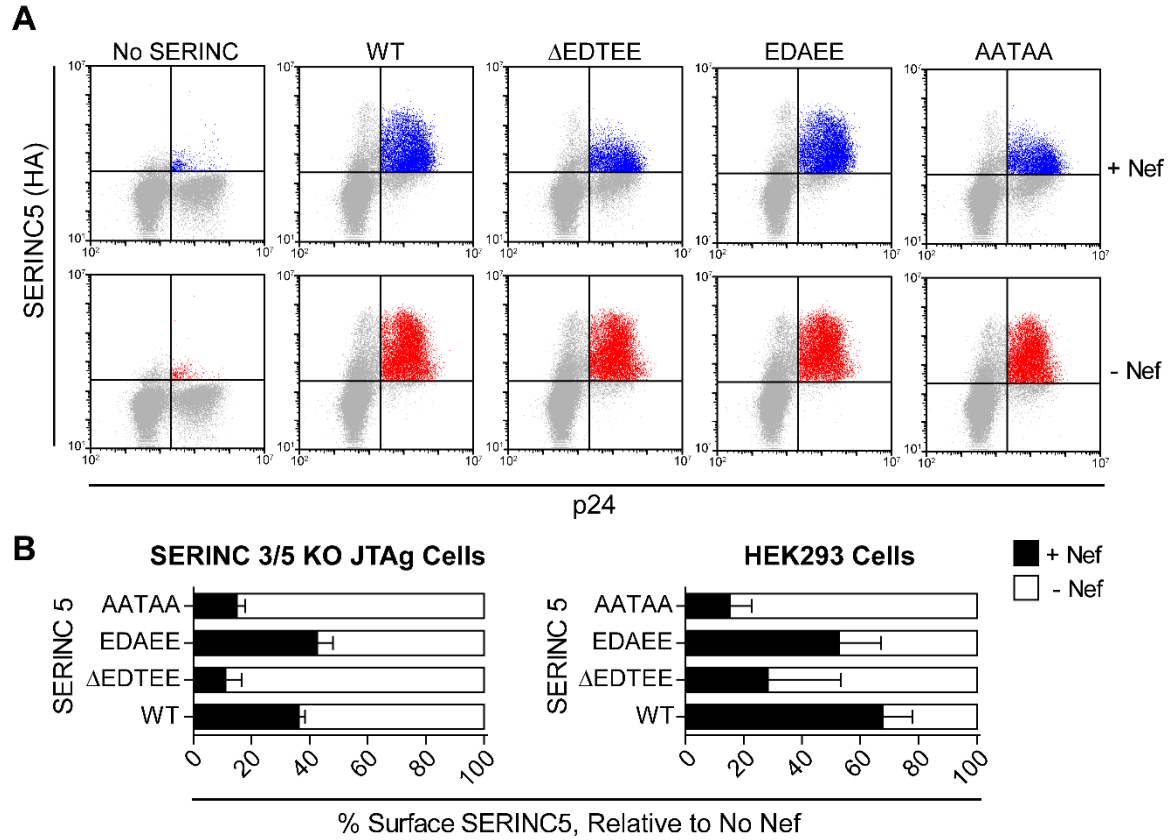

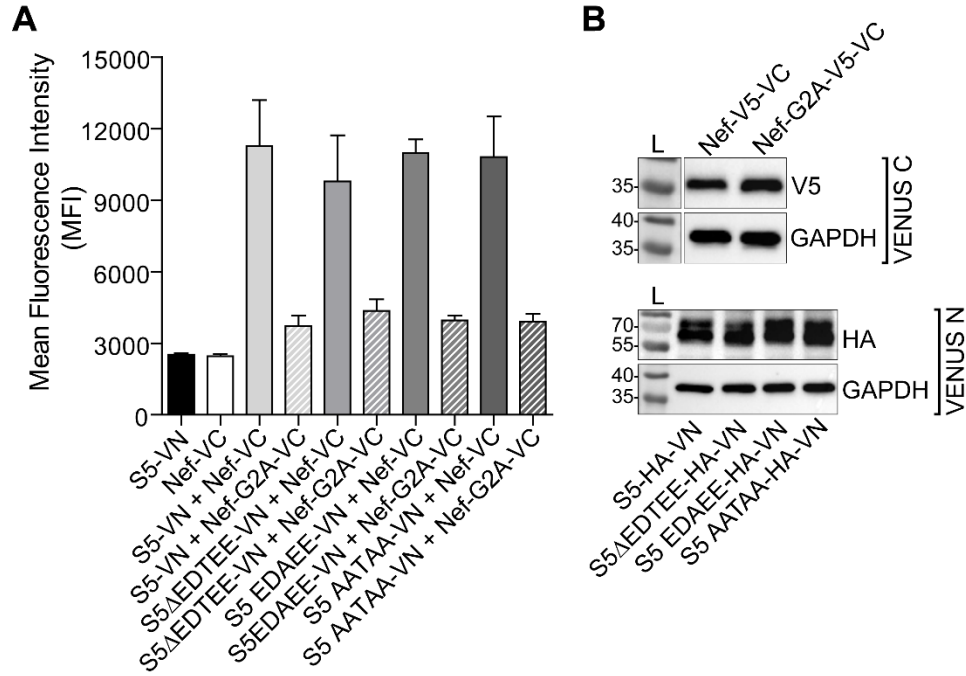

879

880 **FIGURE 6**

881

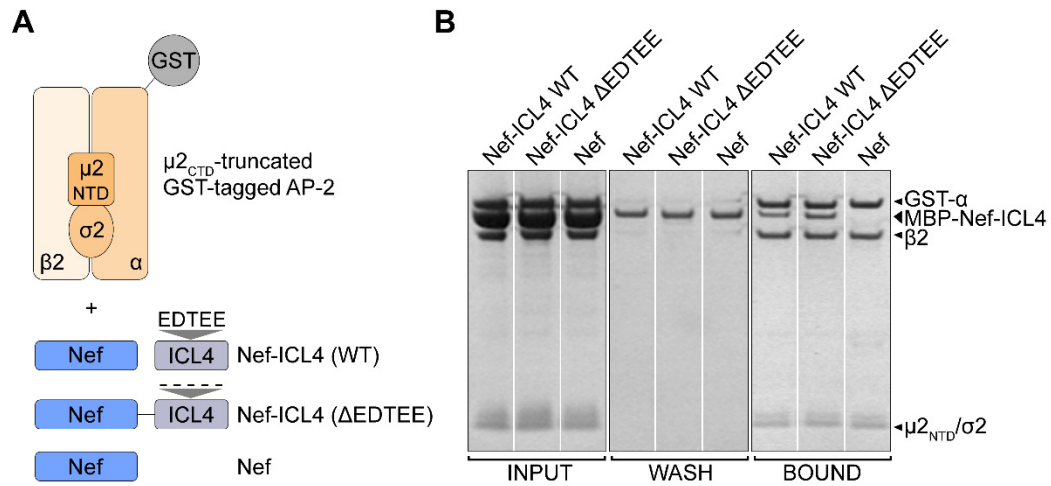

882  
883  
884

**FIGURE 7**

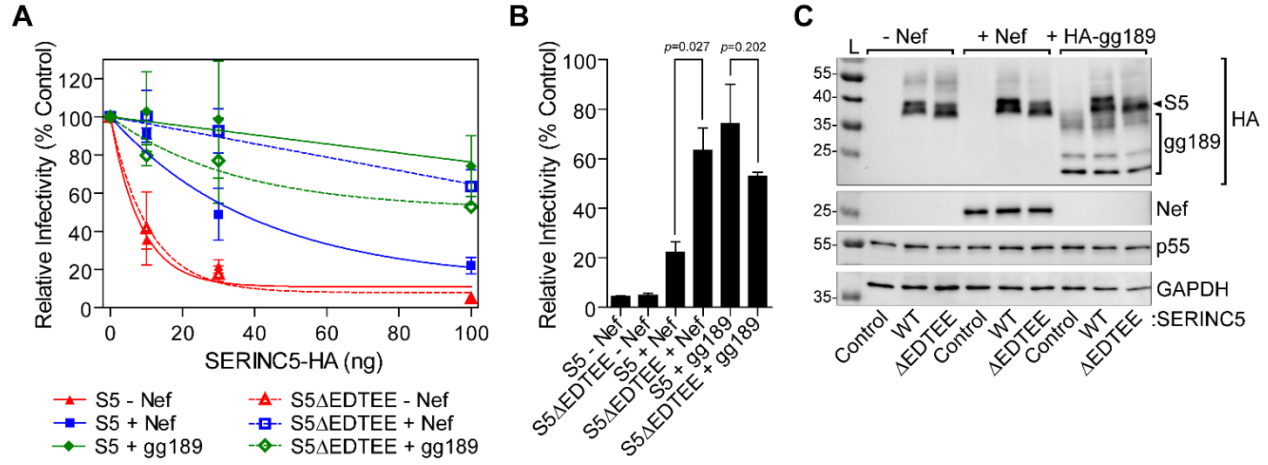

885  
886  
887  
888  
889  
890  
891

**FIGURE 8**
